# Supplementary figures and images for: Molecular signatures of tumor progression in pancreatic adenocarcinoma identified by energy metabolism characteristics
Source: Research Square preprint supplement (doi:10.21203/rs.3.rs-478202/v1), 2021-05-20

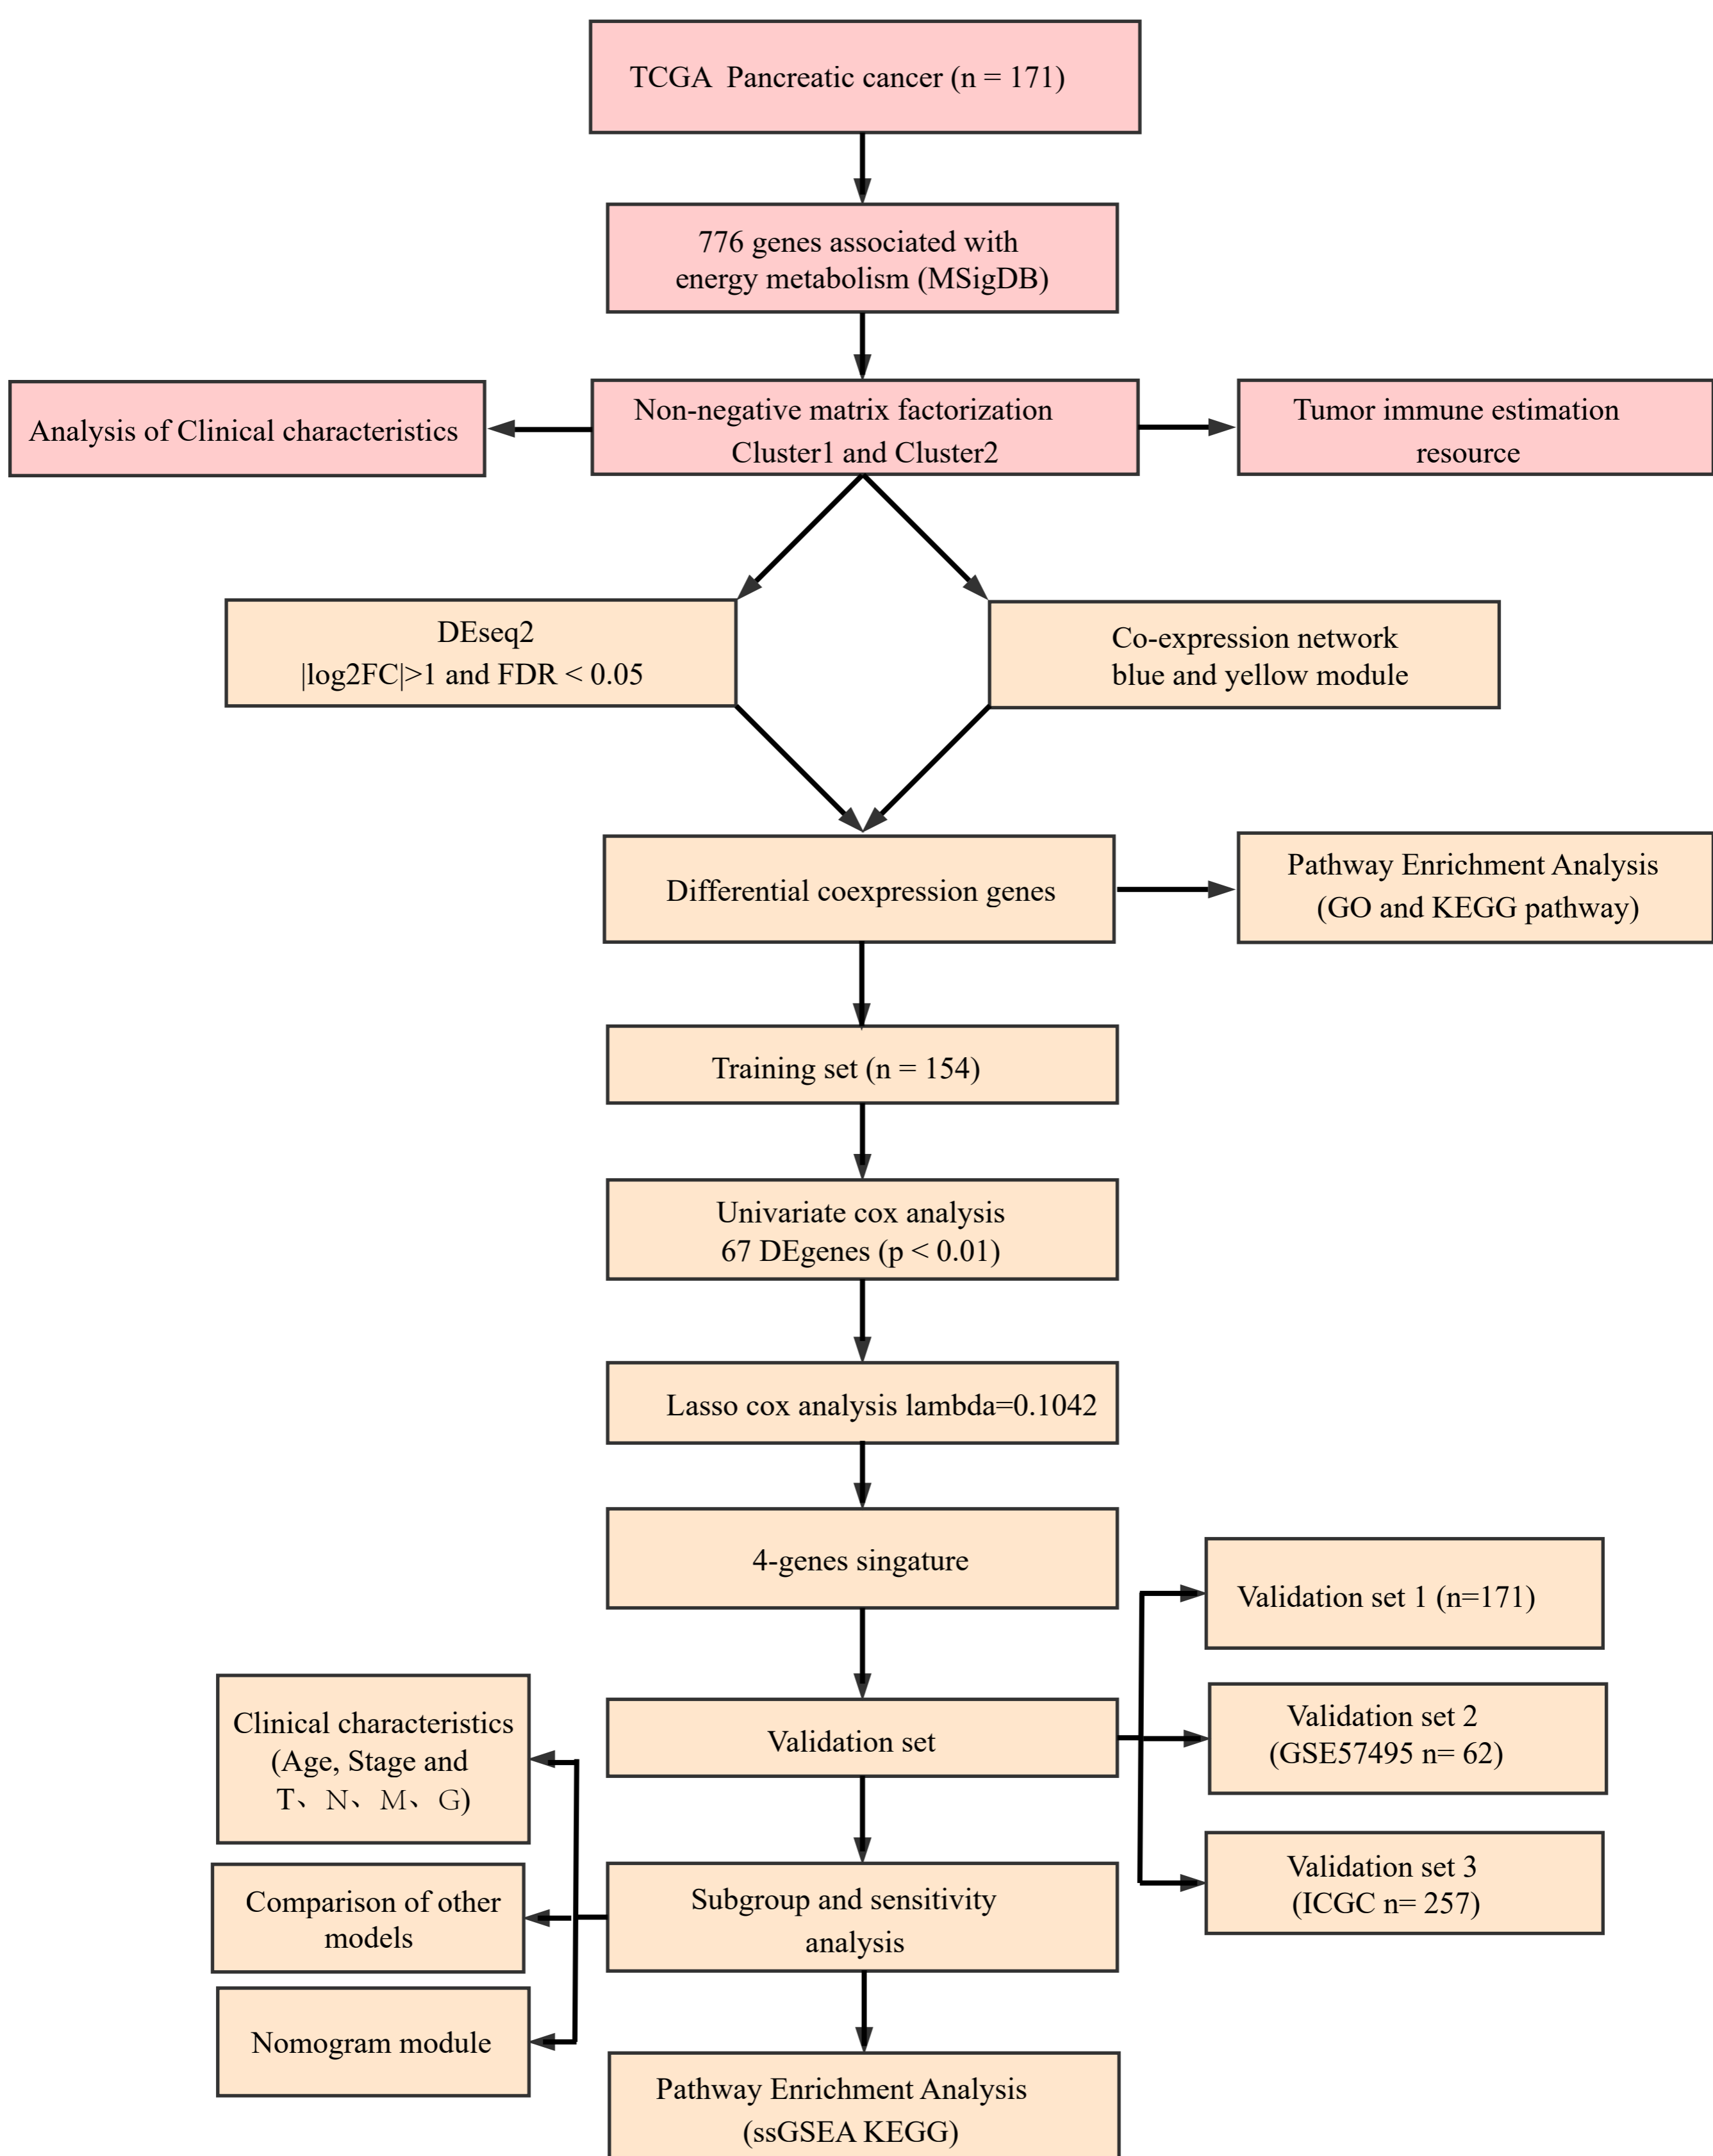

Supplement: Supplementary file 1 [file 7b64a27d46bf6f35c0136f0e.pdf]

A

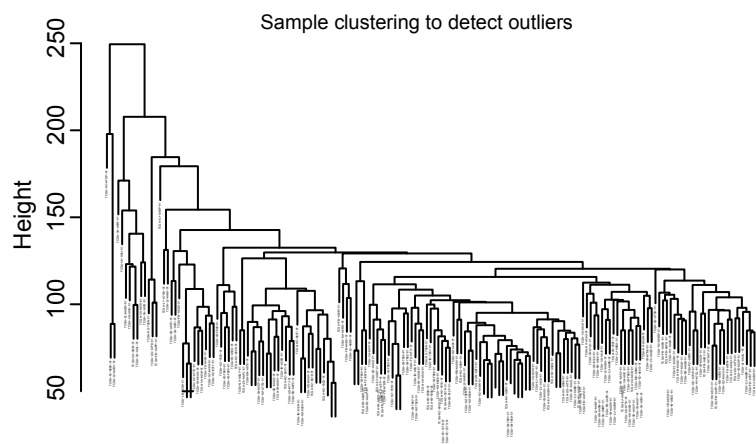

B

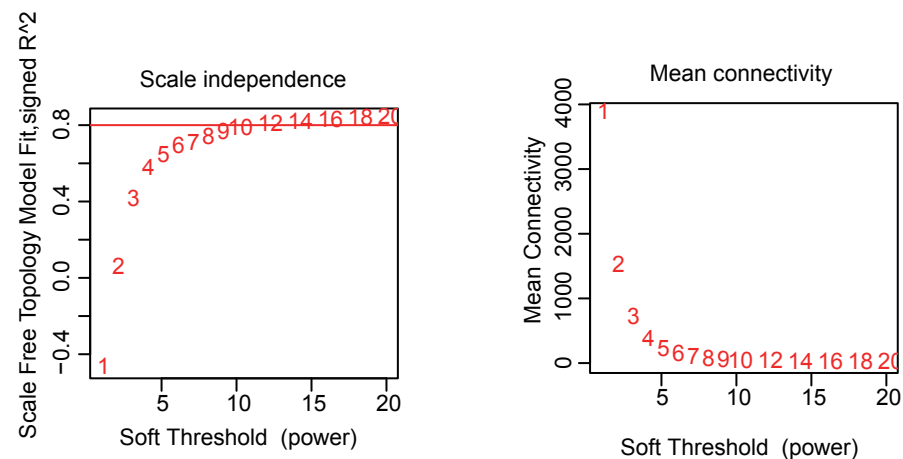

C

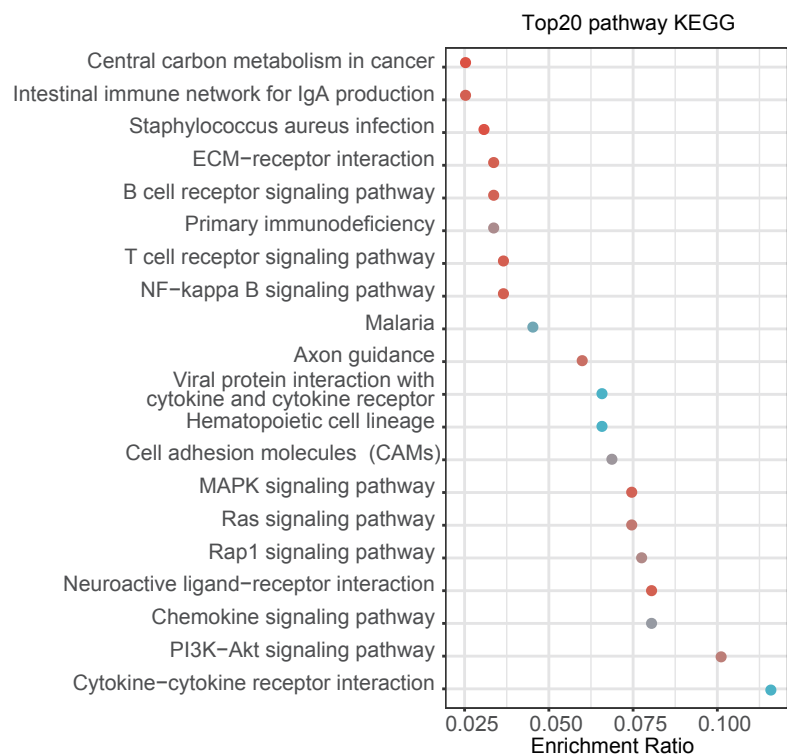

D

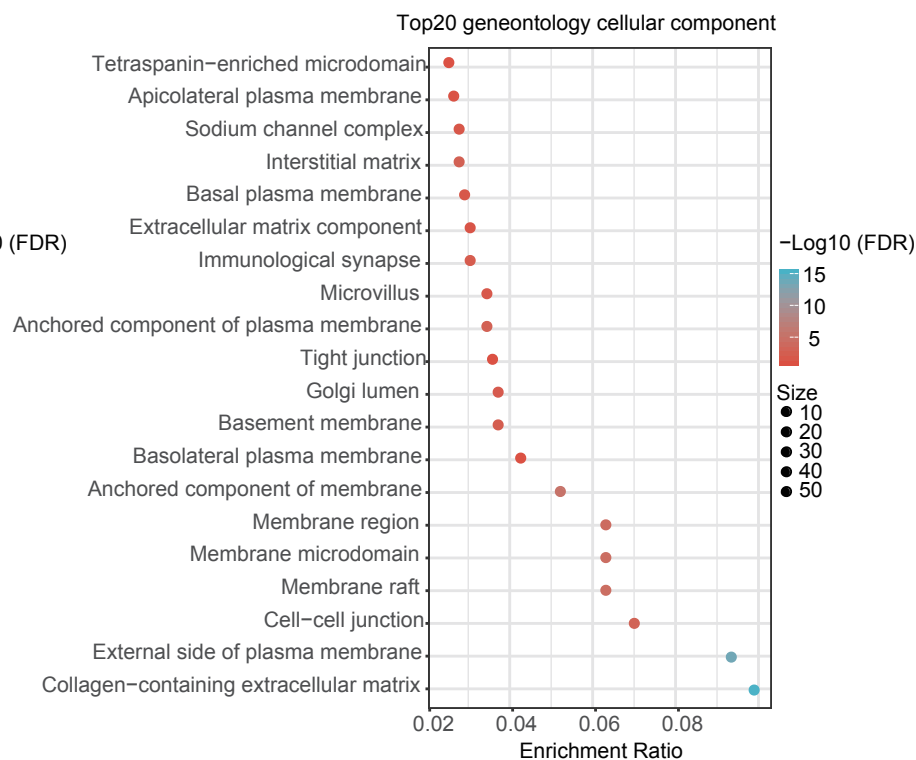

E

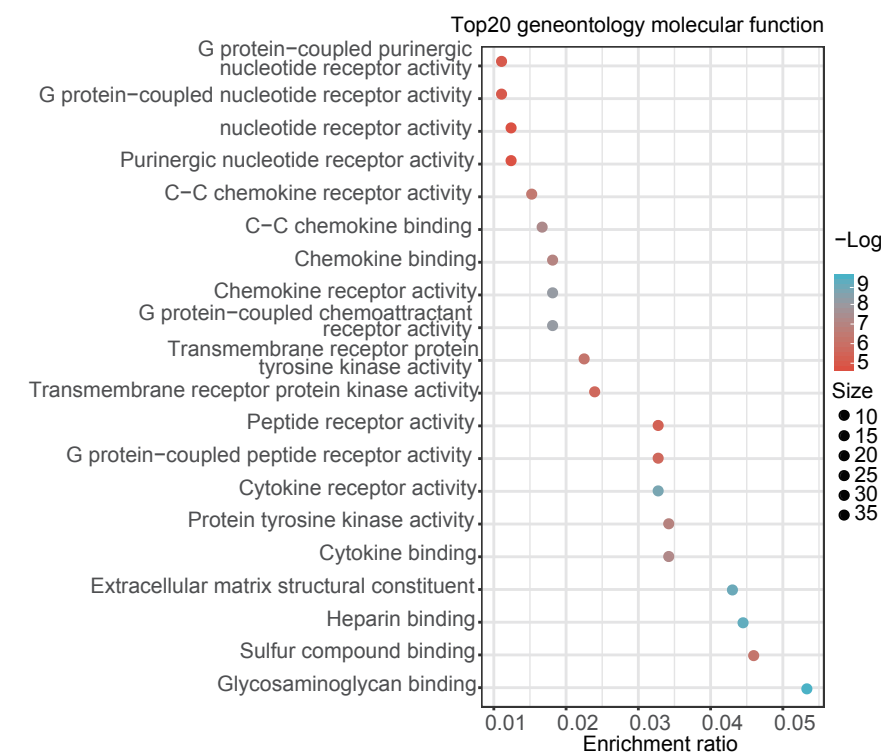

F

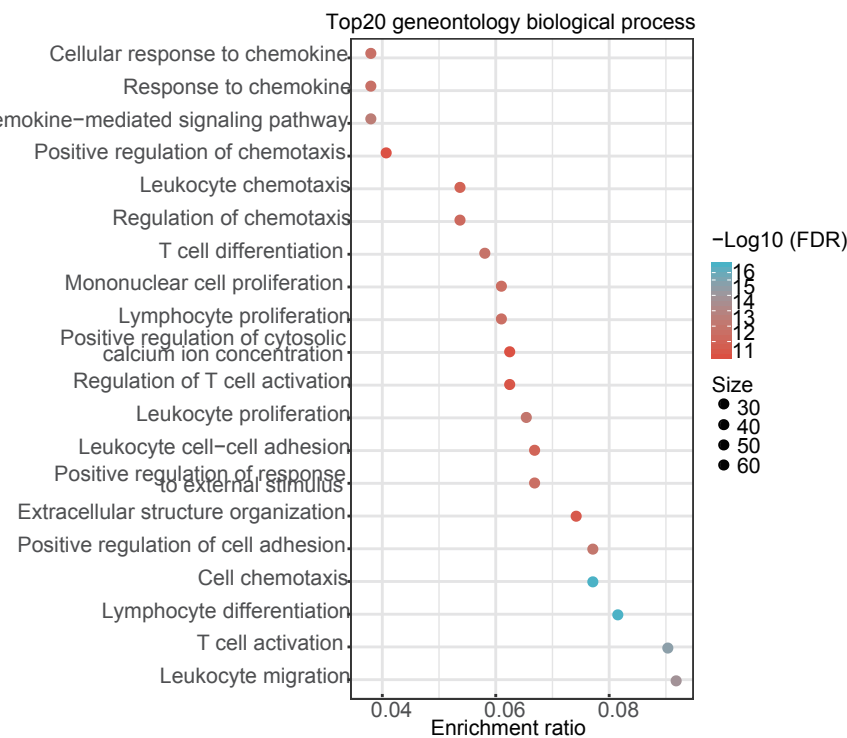

Supplement: Supplementary file 2 [file 83457626d11565f2f98c69b4.pdf]
